# Supplementary material
Source: Springer Nature journal article supplement (https://www.springermedizin.de/resource/supplementary/13044_2010_22_MOESM3_ESM.pdf/9659972)

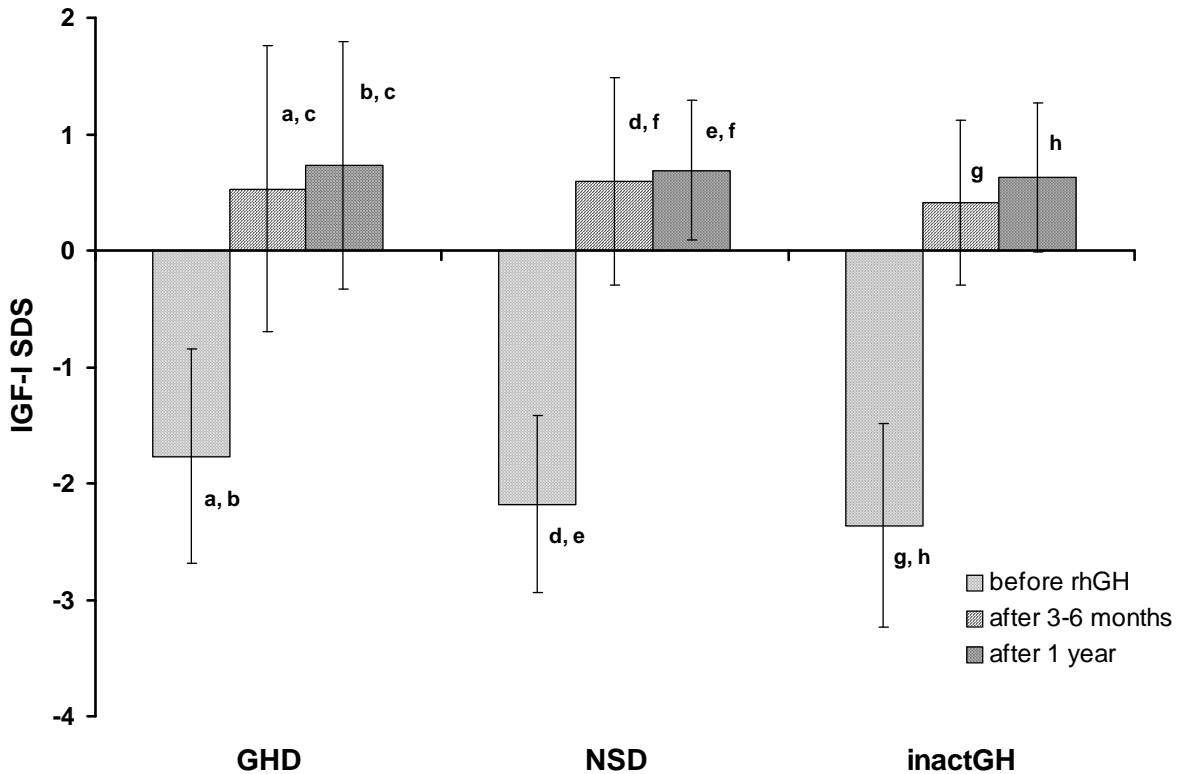

Significant differences:

a, b –  $p < 0.00001$ ; c –  $p < 0.05$ ; d –  $p < 0.0005$ ; e –  $p < 0.0001$ ;

f –  $p < 0.05$ ; g, h –  $p < 0.001$

Supplement: MOESM3 [file 9659972]
